# Supplementary material for: Short Term Evaluation of an Anatomically Shaped Polycarbonate Urethane Total Meniscus Replacement in a Goat Model
Source: PubMed Central journal article supplement (PMC4507942; doi:10.1371/journal.pone.0133138), 2015-07-20
Supplement: pone.0133138.s002.pdf [file pone.0133138.s002.pdf]

| AnimalID          | Cartilage - Macroscopic score |          |          |          | Extrusion |        | Deformation                                      |          |                |        |        |
|-------------------|-------------------------------|----------|----------|----------|-----------|--------|--------------------------------------------------|----------|----------------|--------|--------|
|                   | Tibia                         |          | Femur    |          | Femoral   | Tibial | Anterior area                                    | Mid area | Posterior area | Length | Width  |
|                   | grader 1                      | grader 2 | grader 1 | grader 2 | (mm)      | (mm)   | (% change with respect to the reference implant) |          |                |        |        |
| Implant 1         | 4                             | 4        | 2        | 2        | 4.89      | 3.08   | -0.2%                                            | 0.3%     | -7.9%          | 1.46%  | 0.86%  |
| Implant 2         | 3                             | 3        | 2        | 2        | 2.99      | 2.99   | -1.8%                                            | -0.2%    | -12.1%         | 2.52%  | 0.75%  |
| Implant 3         | 4                             | 3        | 2        | 2        | 3.62      | 4.80   | -5.4%                                            | -5.8%    | -13.6%         | 2.49%  | -0.19% |
| Implant 4         | 2                             | 2        | 2        | 2        | 4.25      | 5.06   | -0.9%                                            | 1.6%     | -14.8%         | 2.13%  | 1.74%  |
| Implant 5         | 3                             | 2        | 2        | 2        | 2.16      | 2.93   | -0.5%                                            | 0.2%     | -11.5%         | 3.02%  | 1.27%  |
| Implant 6         | 3                             | 2        | 4        | 4        | 2.73      | 3.36   | 0.2%                                             | 0.8%     | -12.3%         | 3.74%  | 0.99%  |
| Implant 7         | 3                             | 3        | 2        | 2        | 3.66      | 7.02   | -4.3%                                            | -4.9%    | -14.1%         | 2.62%  | -0.17% |
| Implant-control 1 | 2                             | 2        | 2        | 2        |           |        |                                                  |          |                |        |        |
| Implant-control 2 | 3                             | 3        | 2        | 2        |           |        |                                                  |          |                |        |        |
| Implant-control 3 | 1                             | 1        | 2        | 2        |           |        |                                                  |          |                |        |        |
| Implant-control 4 | 2                             | 2        | 2        | 2        |           |        |                                                  |          |                |        |        |
| Implant-control 5 | 3                             | 2        | 2        | 2        |           |        |                                                  |          |                |        |        |
| Implant-control 6 | 1                             | 1        | 2        | 2        |           |        |                                                  |          |                |        |        |
| Implant-control 7 | 1                             | 2        | 3        | 3        |           |        |                                                  |          |                |        |        |
| Sham 1            | 2                             | 1        | 1        | 1        | 0.75      | 1.27   |                                                  |          |                |        |        |
| Sham 2            | 1                             | 1        | 1        | 1        | 1.36      | 0.78   |                                                  |          |                |        |        |
| Sham 3            | 1                             | 1        | 2        | 2        | 0.53      | 1.07   |                                                  |          |                |        |        |
| Sham 4            | 2                             | 2        | 2        | 2        | 1.32      | 0.69   |                                                  |          |                |        |        |
| Sham 5            | 1                             | 1        | 2        | 2        | 0.75      | 1.60   |                                                  |          |                |        |        |
| Sham 6            | 2                             | 2        | 2        | 2        | 0.88      | 1.36   |                                                  |          |                |        |        |
| Sham-control 1    | 1                             | 1        | 2        | 2        |           |        |                                                  |          |                |        |        |
| Sham-control 2    | 2                             | 2        | 2        | 2        |           |        |                                                  |          |                |        |        |
| Sham-control 3    | 2                             | 2        | 2        | 2        |           |        |                                                  |          |                |        |        |
| Sham-control 4    | 3                             | 2        | 2        | 2        |           |        |                                                  |          |                |        |        |
| Sham-control 5    | 2                             | 2        | 2        | 2        |           |        |                                                  |          |                |        |        |
| Sham-control 6    | 2                             | 2        | 2        | 2        |           |        |                                                  |          |                |        |        |

| AnimalID          | Synovium - Histology score |          | Cartilage - Modified Mankin score |          |             |          |          |          |    |
|-------------------|----------------------------|----------|-----------------------------------|----------|-------------|----------|----------|----------|----|
|                   | grader 1                   | grader 2 | Tibia-inner                       |          | Tibia-outer |          | Femur    |          |    |
|                   |                            |          | grader 1                          | grader 2 | grader 1    | grader 2 | grader 1 | grader 2 |    |
| Implant 1         |                            | 2        | 5                                 | 21       | 23          | 21       | 8        | 16       | 19 |
| Implant 2         |                            | 3        | 7                                 | 22       | 18          | 11       | 11       | 10       | 10 |
| Implant 3         |                            | 6        | 8                                 |          |             | 25       | 24       | 13       | 10 |
| Implant 4         |                            | 4        | 2                                 | 21       | 19          | 15       | 17       | 10       | 6  |
| Implant 5         |                            | 3        | 6                                 | 17       | 19          | 12       | 13       | 20       | 20 |
| Implant 6         |                            | 7        | 6                                 | 9        | 7           | 12       | 9        | 12       | 9  |
| Implant 7         |                            | 6        | 12                                | 18       | 18          |          |          | 15       | 13 |
| Implant-control 1 |                            | 1        | 6                                 | 15       | 17          | 9        | 9        | 8        | 2  |
| Implant-control 2 |                            | 5        | 6                                 | 20       | 19          | 12       | 11       | 9        | 8  |
| Implant-control 3 |                            | 2        | 1                                 | 20       | 17          | 9        | 6        | 6        | 4  |
| Implant-control 4 |                            | 0        | 2                                 | 19       | 19          | 5        | 5        | 6        | 6  |
| Implant-control 5 |                            | 3        | 7                                 | 15       | 14          | 7        | 7        | 9        | 2  |
| Implant-control 6 |                            | 6        | 3                                 | 12       | 10          | 5        | 6        | 5        | 3  |
| Implant-control 7 |                            | 4        | 3                                 | 15       | 19          | 8        | 5        | 7        | 3  |
| Sham 1            |                            | 5        | 6                                 |          |             | 4        | 5        | 5        | 2  |
| Sham 2            |                            | 5        | 8                                 | 18       | 30          | 5        | 4        | 9        | 9  |
| Sham 3            |                            | 4        | 2                                 | 19       | 20          | 9        | 5        | 5        | 1  |
| Sham 4            |                            | 4        | 2                                 | 19       | 18          | 7        | 7        | 6        | 8  |
| Sham 5            |                            | 3        | 6                                 | 19       | 18          | 6        | 5        | 4        | 2  |
| Sham 6            |                            | 3        | 2                                 | 21       | 19          | 9        | 4        | 7        | 1  |
| Sham-control 1    |                            | 5        | 6                                 | 20       | 20          | 5        | 4        | 11       | 3  |
| Sham-control 2    |                            | 3        | 4                                 | 16       | 15          | 8        | 6        | 4        | 1  |
| Sham-control 3    |                            | 2        | 3                                 | 20       | 19          | 7        | 5        | 5        | 2  |
| Sham-control 4    |                            | 2        | 3                                 | 17       | 19          | 7        | 6        | 7        | 5  |
| Sham-control 5    |                            | 3        | 8                                 | 17       | 18          | 8        | 5        | 6        | 4  |
| Sham-control 6    |                            | 3        | 2                                 |          |             |          |          | 7        | 0  |

**Cartilage - Affected Area score**

| <b>AnimalID</b>   | <b>Tibia-inner</b> |                 | <b>Tibia-outer</b> |                 | <b>Femur</b>    |                 |
|-------------------|--------------------|-----------------|--------------------|-----------------|-----------------|-----------------|
|                   | <i>grader 1</i>    | <i>grader 2</i> | <i>grader 1</i>    | <i>grader 2</i> | <i>grader 1</i> | <i>grader 2</i> |
|                   | Implant 1          | 5               | 5                  | 3               | 4               | 4               |
| Implant 2         | 5                  | 5               | 2                  | 1               | 3               | 5               |
| Implant 3         | 0                  | 0               | 5                  | 5               | 4               | 4               |
| Implant 4         | 5                  | 5               | 3                  | 4               | 2               | 0               |
| Implant 5         | 4                  | 5               | 3                  | 3               | 4               | 4               |
| Implant 6         | 1                  | 0               | 2                  | 2               | 3               | 4               |
| Implant 7         | 5                  | 5               | 0                  | 0               | 3               | 5               |
| Implant-control 1 | 5                  | 5               | 2                  | 2               | 1               | 0               |
| Implant-control 2 | 5                  | 5               | 1                  | 0               | 1               | 0               |
| Implant-control 3 | 5                  | 5               | 0                  | 0               | 1               | 0               |
| Implant-control 4 | 5                  | 5               | 0                  | 0               | 5               | 5               |
| Implant-control 5 | 4                  | 5               | 1                  | 0               | 0               | 0               |
| Implant-control 6 | 3                  | 4               | 1                  | 0               | 0               | 3               |
| Implant-control 7 | 5                  | 4               | 0                  | 0               | 0               | 0               |
| Sham 1            | 0                  | 0               | 0                  | 0               | 0               | 0               |
| Sham 2            | 5                  | 5               | 1                  | 0               | 5               | 5               |
| Sham 3            | 5                  | 5               | 0                  | 0               | 0               | 0               |
| Sham 4            | 5                  | 5               | 0                  | 0               | 1               | 2               |
| Sham 5            | 5                  | 5               | 2                  | 0               | 0               | 0               |
| Sham 6            | 5                  | 5               | 1                  | 0               | 1               | 0               |
| Sham-control 1    | 5                  | 5               | 1                  | 0               | 3               | 0               |
| Sham-control 2    | 4                  | 5               | 0                  | 0               | 0               | 0               |
| Sham-control 3    | 5                  | 5               | 1                  | 0               | 1               | 0               |
| Sham-control 4    | 5                  | 5               | 0                  | 0               | 1               | 0               |
| Sham-control 5    | 5                  | 5               | 0                  | 0               | 1               | 0               |
| Sham-control 6    | 0                  | 0               | 0                  | 0               | 0               | 0               |
